# Supplementary material for: Facile synthesis and enhanced visible-light photocatalytic activity of graphitic carbon nitride decorated with ultrafine Fe2O3 nanoparticles
Source: Royal Society of Chemistry journal article supplement (doi:10.1039/c5ra18466e), 2015-01-01
Supplement: c5ra18466e1.pdf [file c5ra18466e1.pdf]

Electronic Supplementary Information for

## Facile Synthesis and Enhanced Visible-Light Photocatalytic Activity of Graphitic Carbon Nitride Decorated with Ultrafine Fe<sub>2</sub>O<sub>3</sub> Nanoparticles

Xin Liu,<sup>1</sup> Ailing Jin,<sup>1</sup> Yushuai Jia,\* Junzhe Jiang, Na Hu, and Xiangshu Chen

[\*] Corresponding author: Dr. Yushuai Jia

Email: ysjia@jxnu.edu.cn (Y. S. Jia)

[1] The authors contribute equally to this work.

Jiangxi Inorganic Membrane Materials Engineering Research Centre, College of Chemistry and Chemical Engineering, Jiangxi Normal University, Nanchang 330022, P. R. China

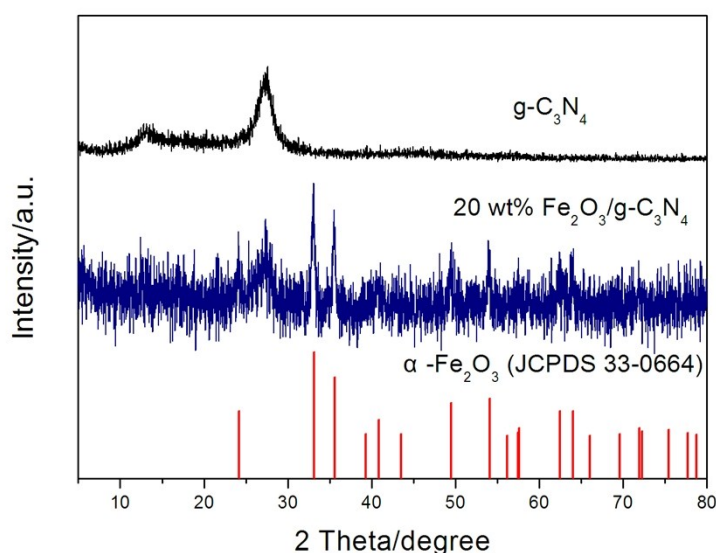

Fig. S1 XRD patterns of 20 wt% Fe<sub>2</sub>O<sub>3</sub>/g-C<sub>3</sub>N<sub>4</sub> nanocomposite, pure g-C<sub>3</sub>N<sub>4</sub> and α-Fe<sub>2</sub>O<sub>3</sub> (JCPDS 33-0664).

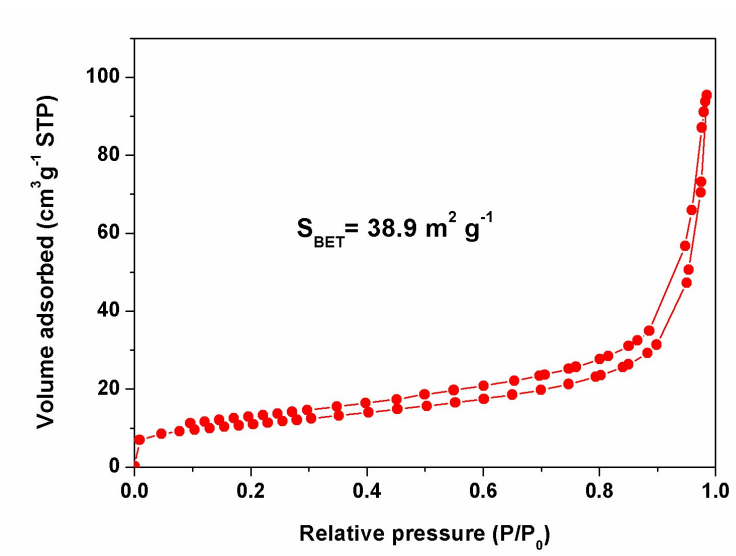

Fig. S2 Nitrogen adsorption/desorption isotherm of pure g-C<sub>3</sub>N<sub>4</sub> at 77 K.
